# Supplementary material for: High-pressure synthesis of ε-FeOOH from β-FeOOH and its application to the water oxidation catalyst
Source: Royal Society of Chemistry journal article supplement (doi:10.1039/d0ra09895g), 2020-01-01
Supplement: d0ra09895g1.pdf [file d0ra09895g1.pdf]

# Supplementary Information

## High-pressure synthesis of $\epsilon$ -FeOOH from $\beta$ -FeOOH and its application to the water oxidation catalyst

Kazuhiko Mukai,<sup>\*,†</sup> Tomiko M. Suzuki,<sup>†</sup> Takeshi Uyama,<sup>†</sup> Takamasa Nonaka,<sup>†</sup>  
Takeshi Morikawa,<sup>†</sup> and Ikuya Yamada<sup>‡</sup>

*Toyota Central Research and Development Laboratories, Inc., 41-1 Yokomichi, Nagakute,  
Aichi 480-1192, Japan, and Department of Materials Science, Graduate School of  
Engineering, Osaka Prefecture University, 1-2 Gakuen-cho, Sakai, Osaka 599-8570, Japan*

\*E-mail: e1089@mosk.tytlabs.co.jp

Phone: +81-561-71-7698. Fax: +81-561-63-6119

---

\*To whom correspondence should be addressed

<sup>†</sup>Toyota Central Research and Development Laboratories, Inc., 41-1 Yokomichi, Nagakute, Aichi 480-1192, Japan

<sup>‡</sup>Department of Materials Science, Graduate School of Engineering, Osaka Prefecture University, 1-2 Gakuen-cho, Sakai, Osaka 599-8570, Japan

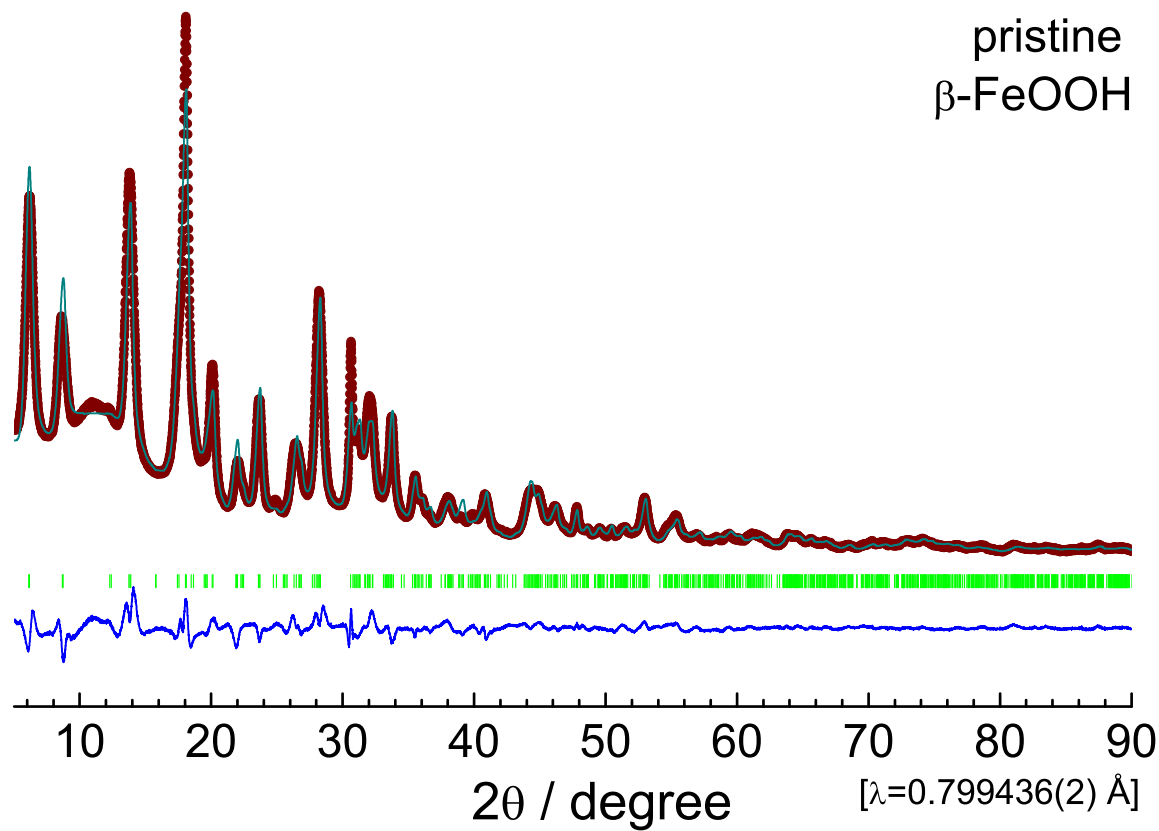

**Fig. S1:** Rietveld analysis result of pristine  $\beta$ -FeOOH. We employed the monoclinic symmetry with  $I4/m$  space group by ignoring the presence of  $\text{H}^+$  ions.

sample 8-400

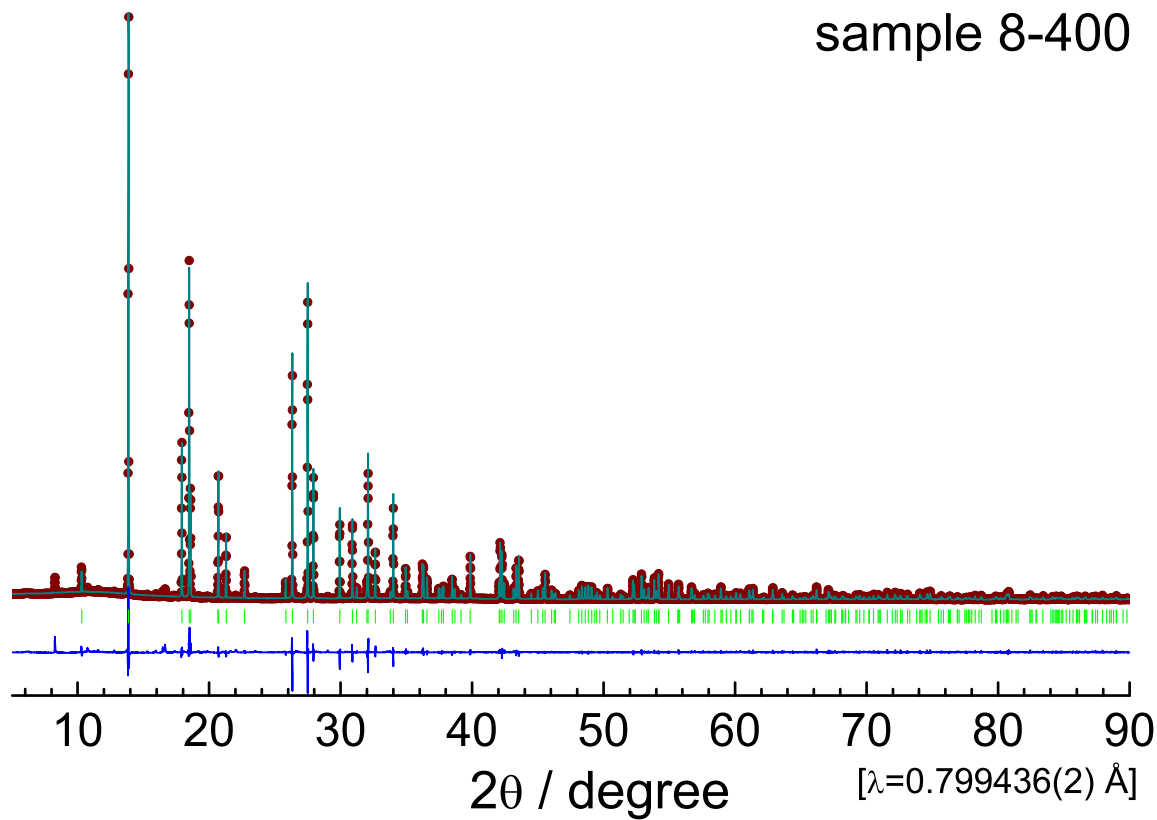

**Fig. S2:** Rietveld analysis result of sample 8-400, which possesses the  $\epsilon$ -FeOOH-type structure with  $Pmn2_1$  space group.

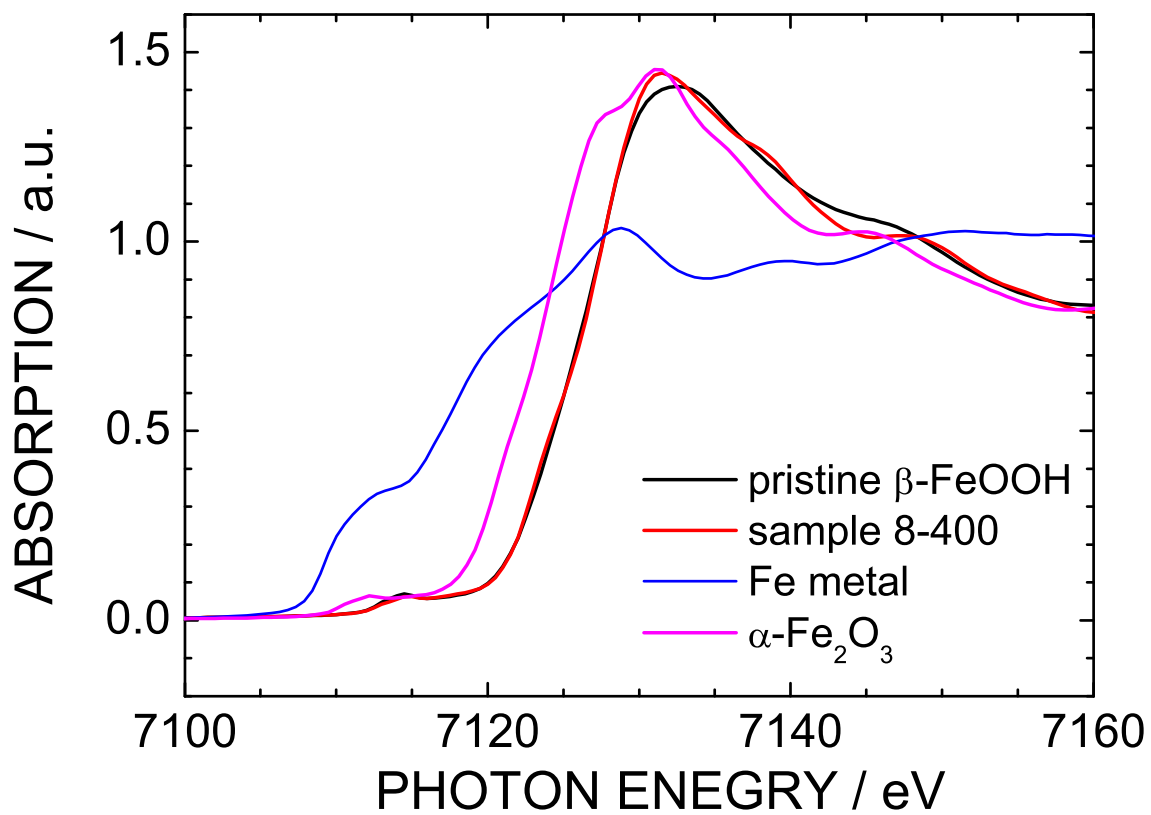

**Fig. S3:** Fe *K*-edge XANES spectra of Fe metal and  $\alpha$ -Fe<sub>2</sub>O<sub>3</sub> together with those of samples of pristine  $\beta$ -FeOOH and 8-400. The peak top energy was 7131.4 eV for  $\alpha$ -Fe<sub>2</sub>O<sub>3</sub> and 7128.7 eV for Fe metal.

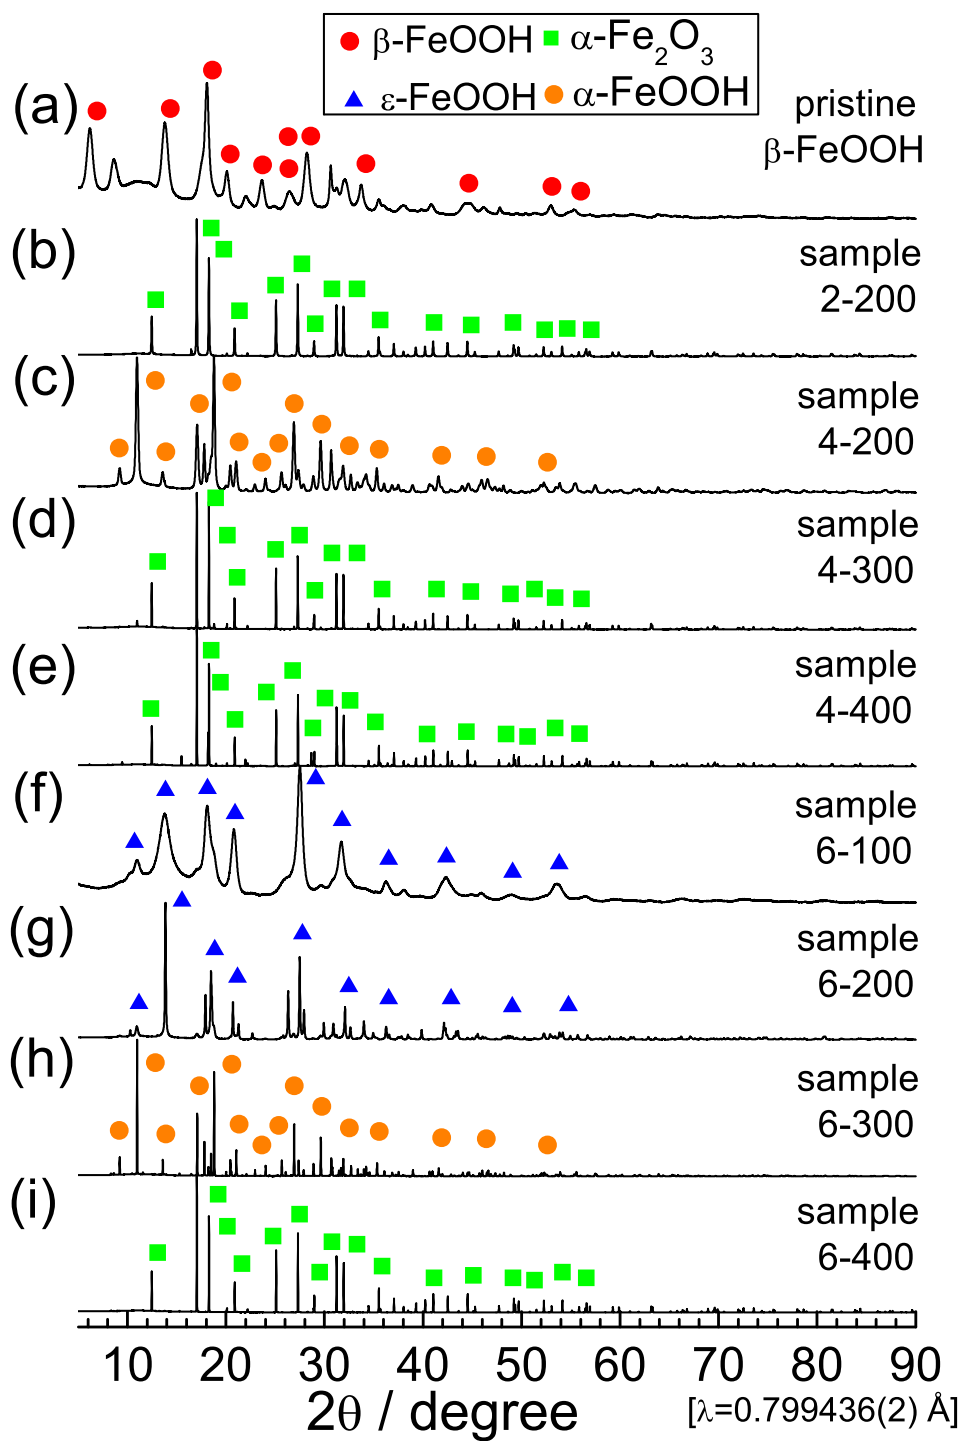

**Fig. S4:** Synchrotron XRD patterns of samples (a) pristine  $\beta$ -FeOOH, (b) 2-200, (c) 4-200, (d) 4-300, (e) 4-400, (f) 6-100, (g) 6-200, (h) 6-300, and (i) 6-400.

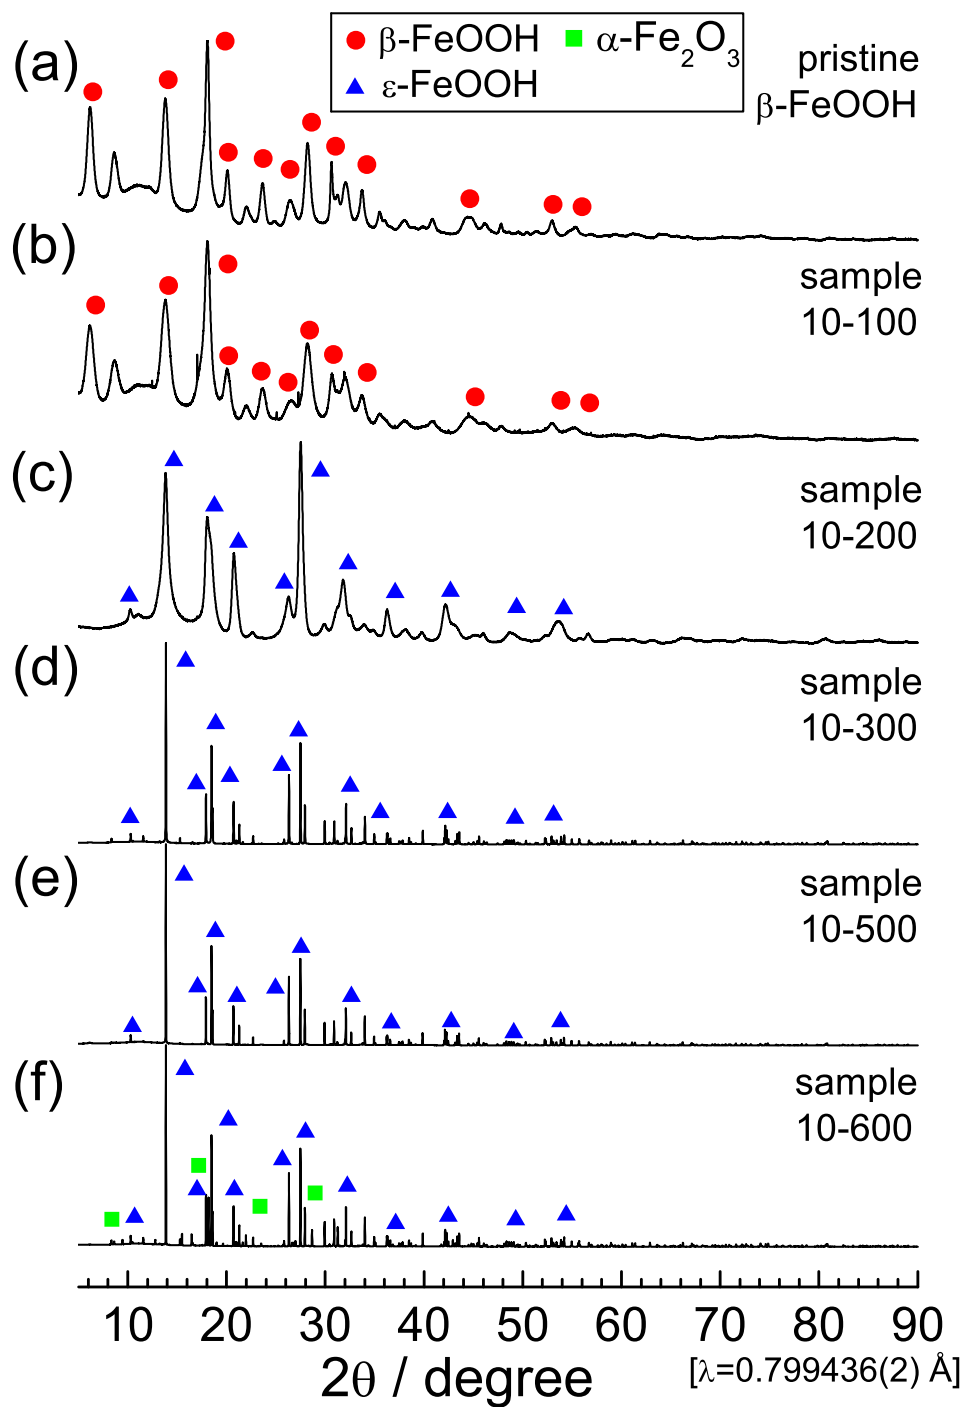

**Fig. S5:** Synchrotron XRD patterns of samples (a) pristine  $\beta$ -FeOOH, (b) 10-100, (c) 10-200, (d) 10-300, (e) 10-500, and (f) 10-600.

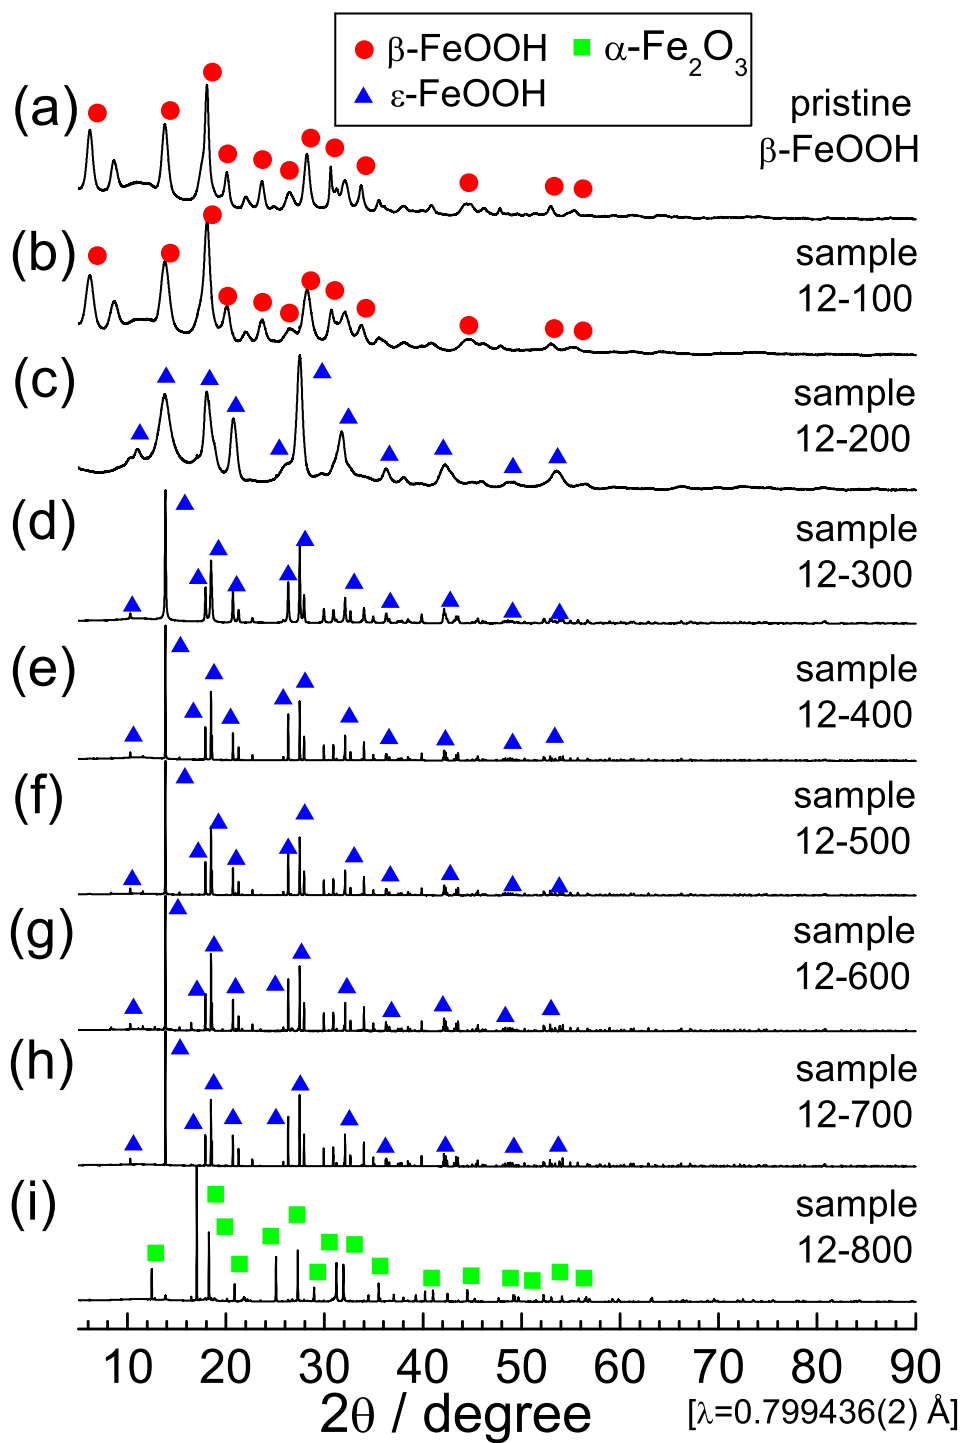

**Fig. S6:** Synchrotron XRD patterns of samples (a) pristine  $\beta$ -FeOOH, (b) 12-100, (c) 12-200, (d) 12-300, (e) 12-400, (f) 12-500, (g) 12-600, (h) 12-700, and (i) 12-800.

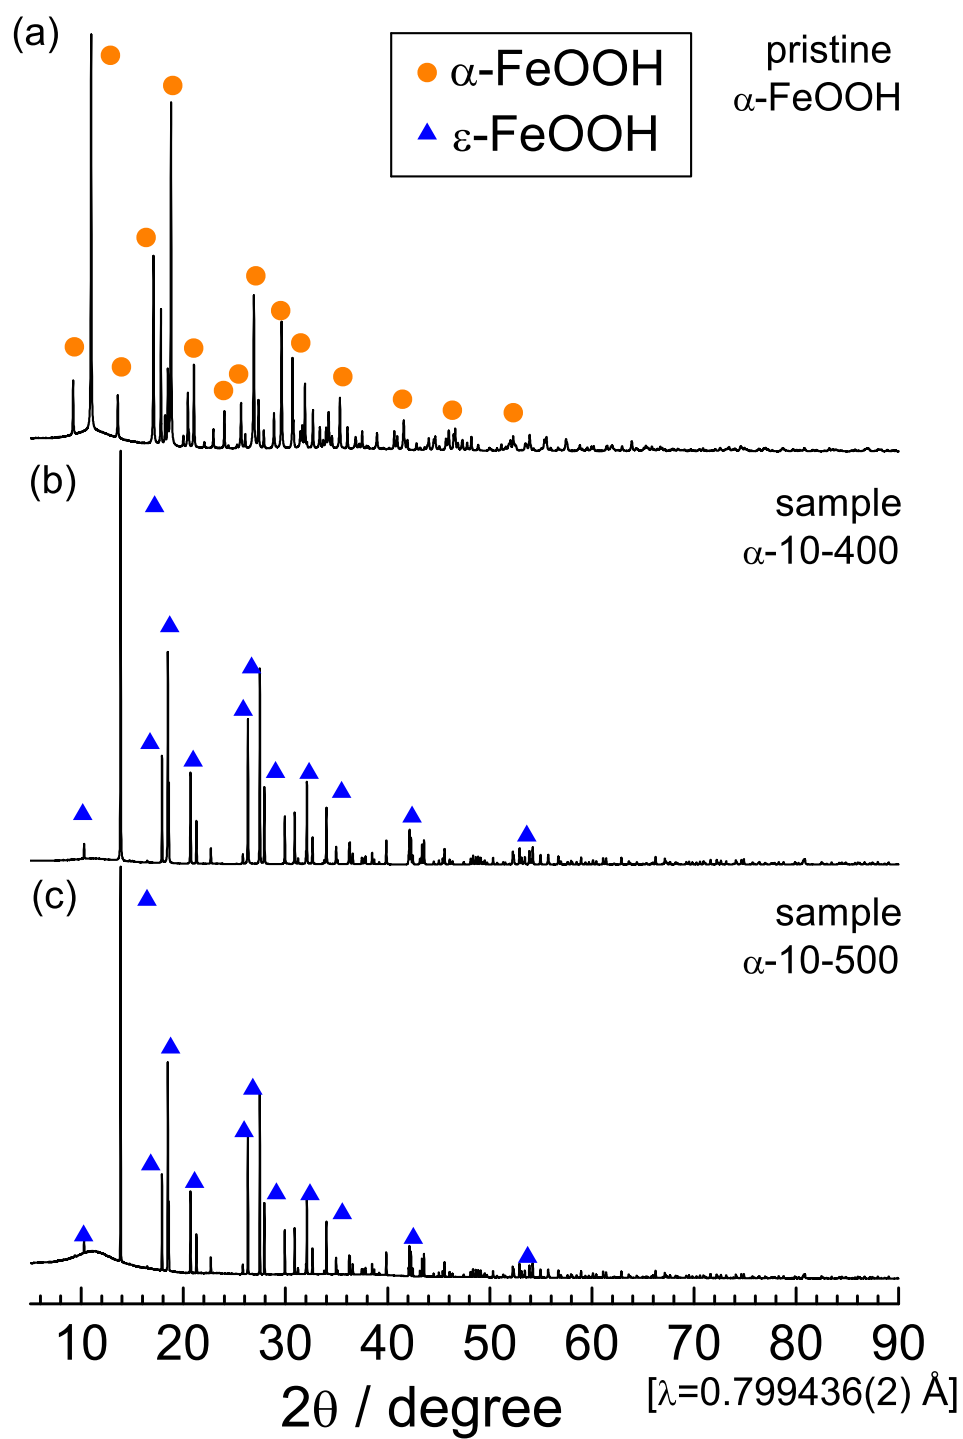

**Fig. S7:** Synchrotron XRD patterns of samples (a) pristine  $\alpha$ -FeOOH, (b)  $\alpha$ -10-400 and (c)  $\alpha$ -10-500.



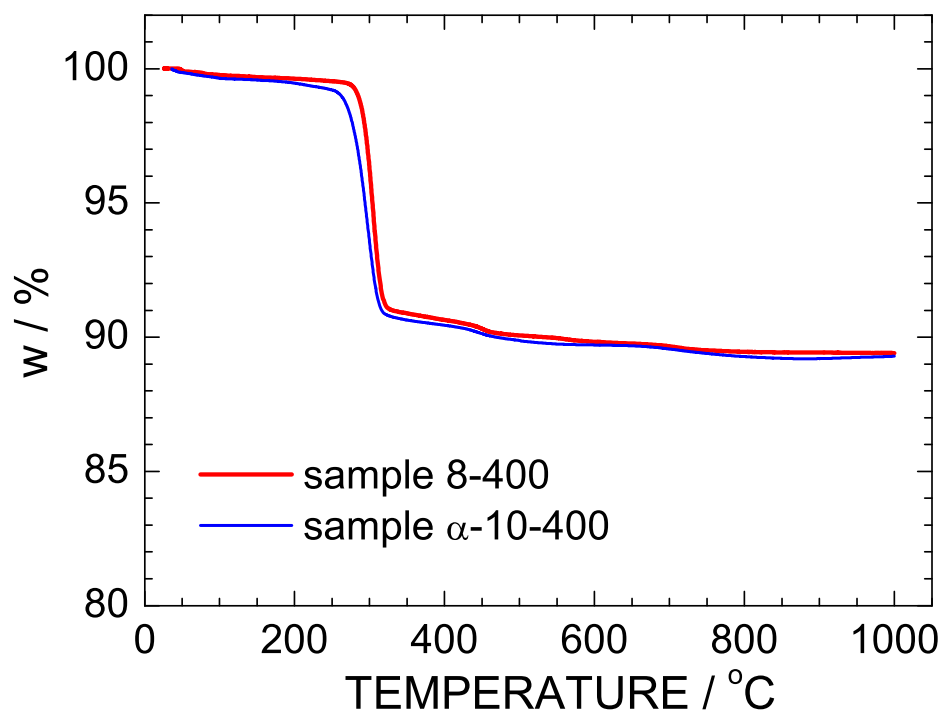

**Fig. S8:** Comparison of the TG curves of samples of 8-400 and  $\alpha$ -10-400.

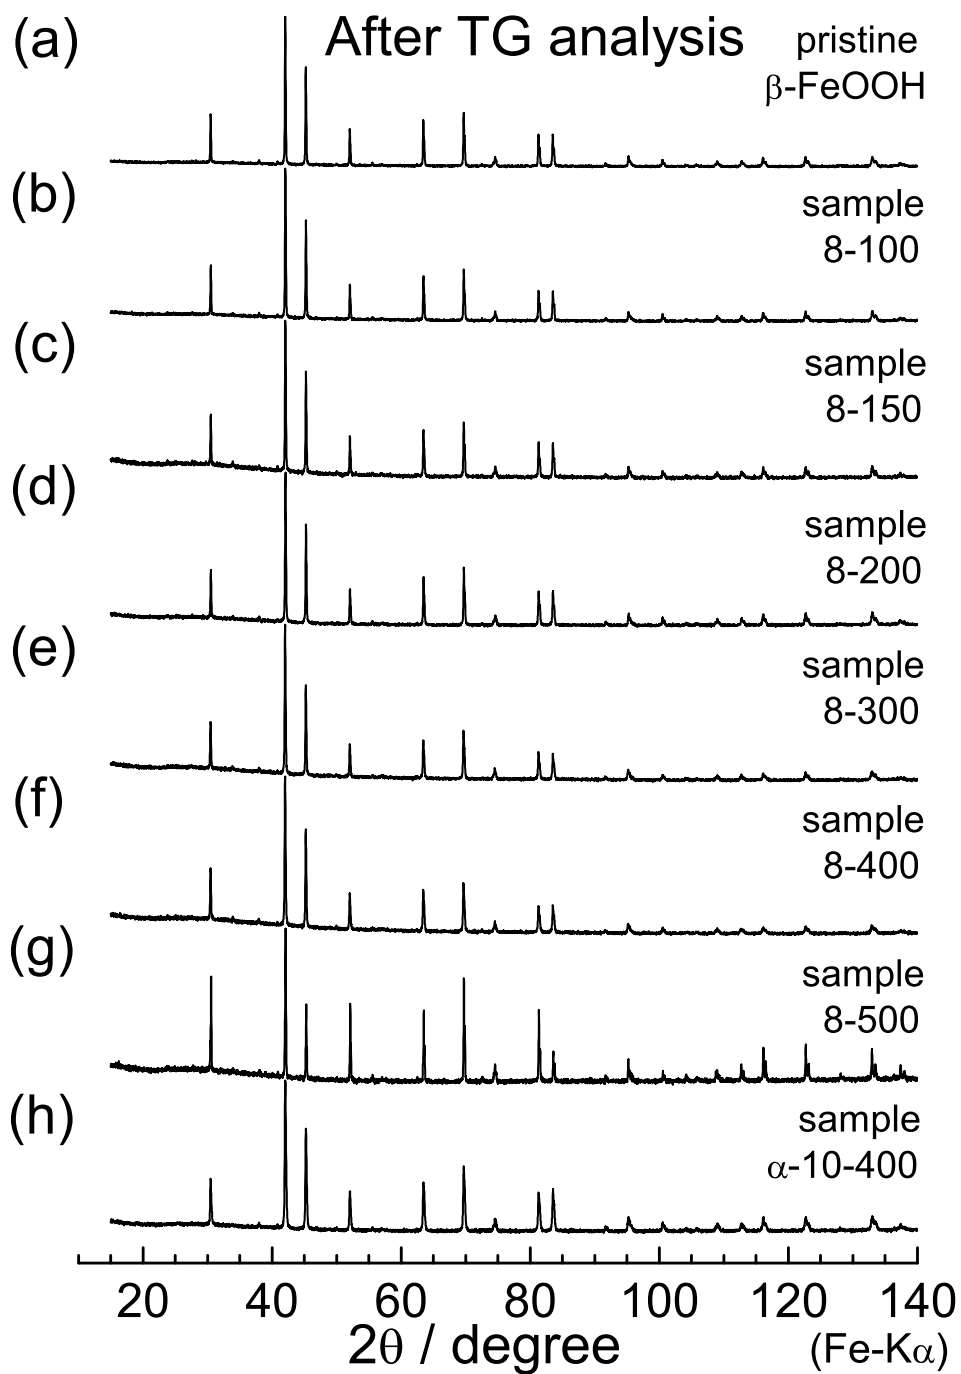

**Fig. S9:** XRD patterns after the TG analysis of samples (a) pristine  $\beta$ -FeOOH, (b) 8-100, (c) 8-150, (d) 8-200, (e) 8-300, (f) 8-400, (g) 8-500, and (h)  $\alpha$ -10-400.

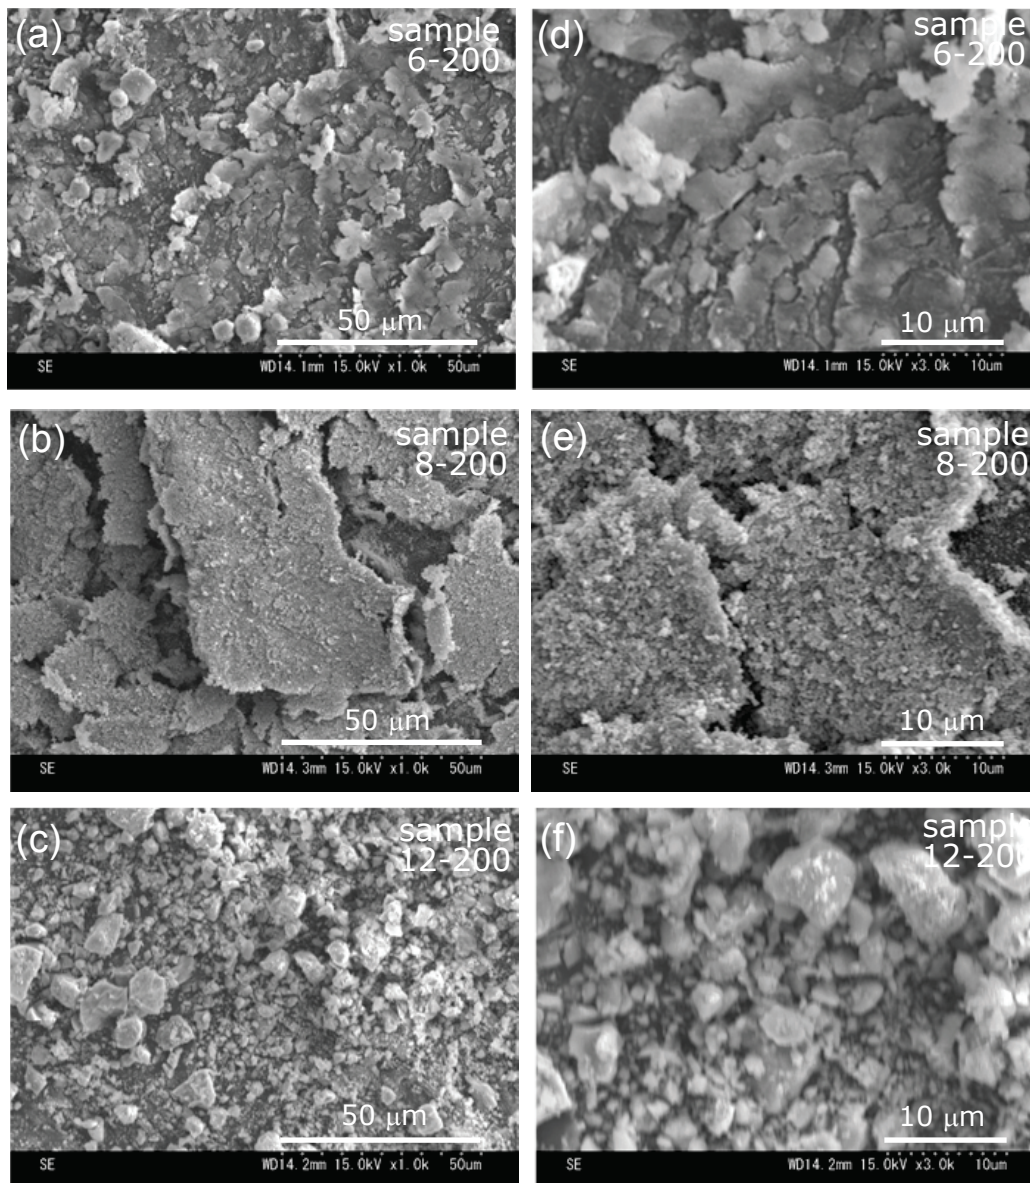

**Fig. S10:** SEM images at the 50 $\mu$ m-scale of samples (a) 6-200, (b) 8-200, and (c) 12-200. Corresponding enlarged SEM images are shown in (d)–(f).

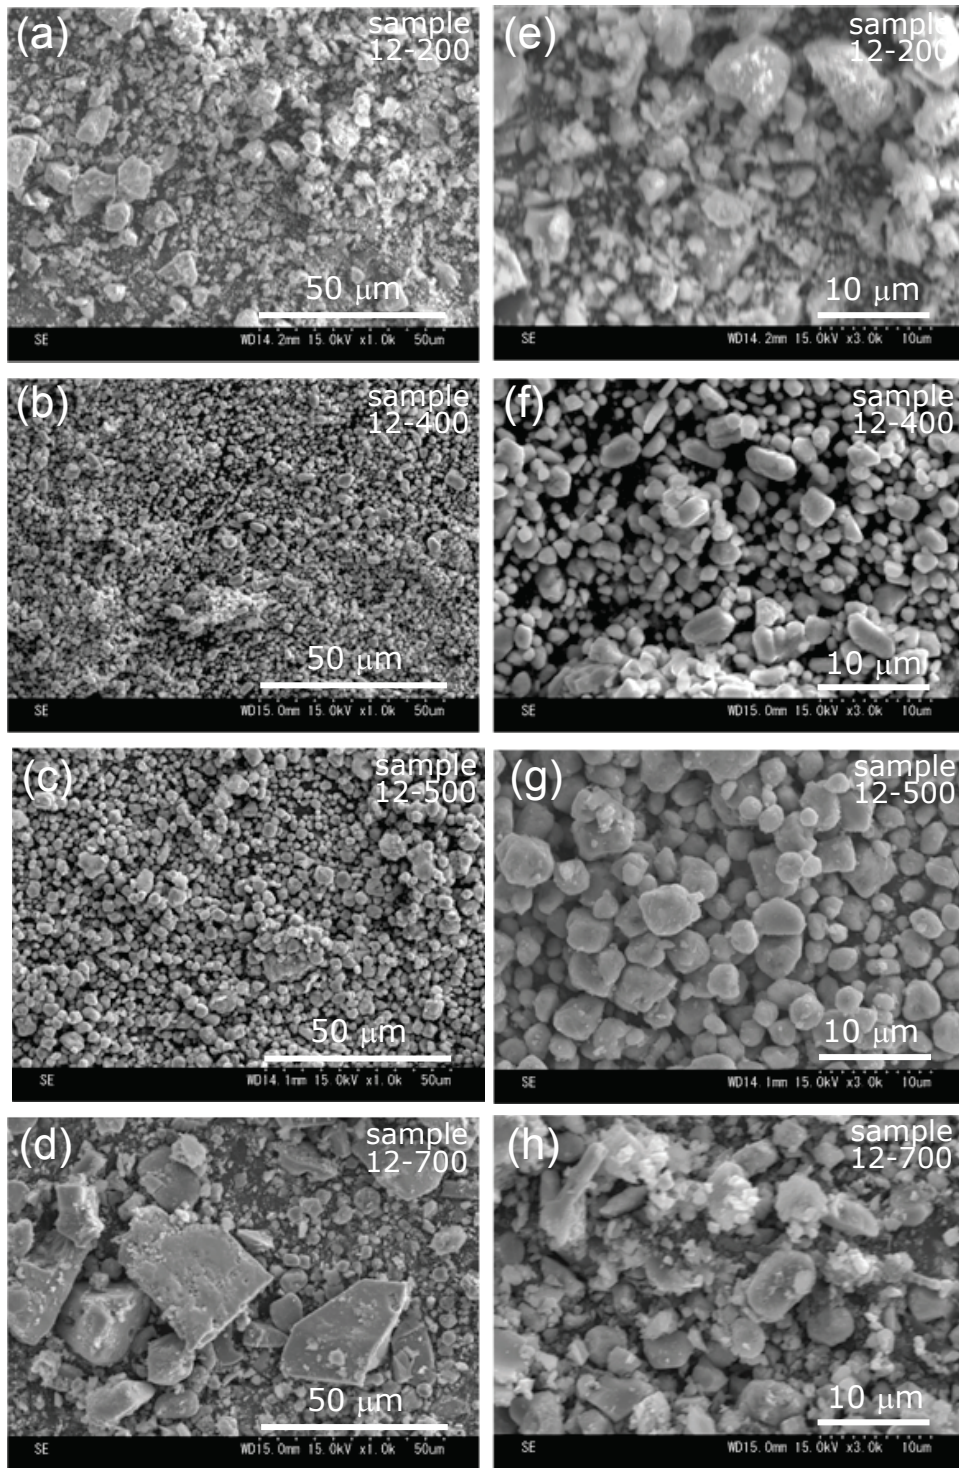

**Fig. S11:** SEM images at the 50 $\mu$ m-scale of samples (a) 12-200, (b) 12-400, (c) 12-500, and (d) 12-700. Corresponding enlarged SEM images are shown in (e)–(h).

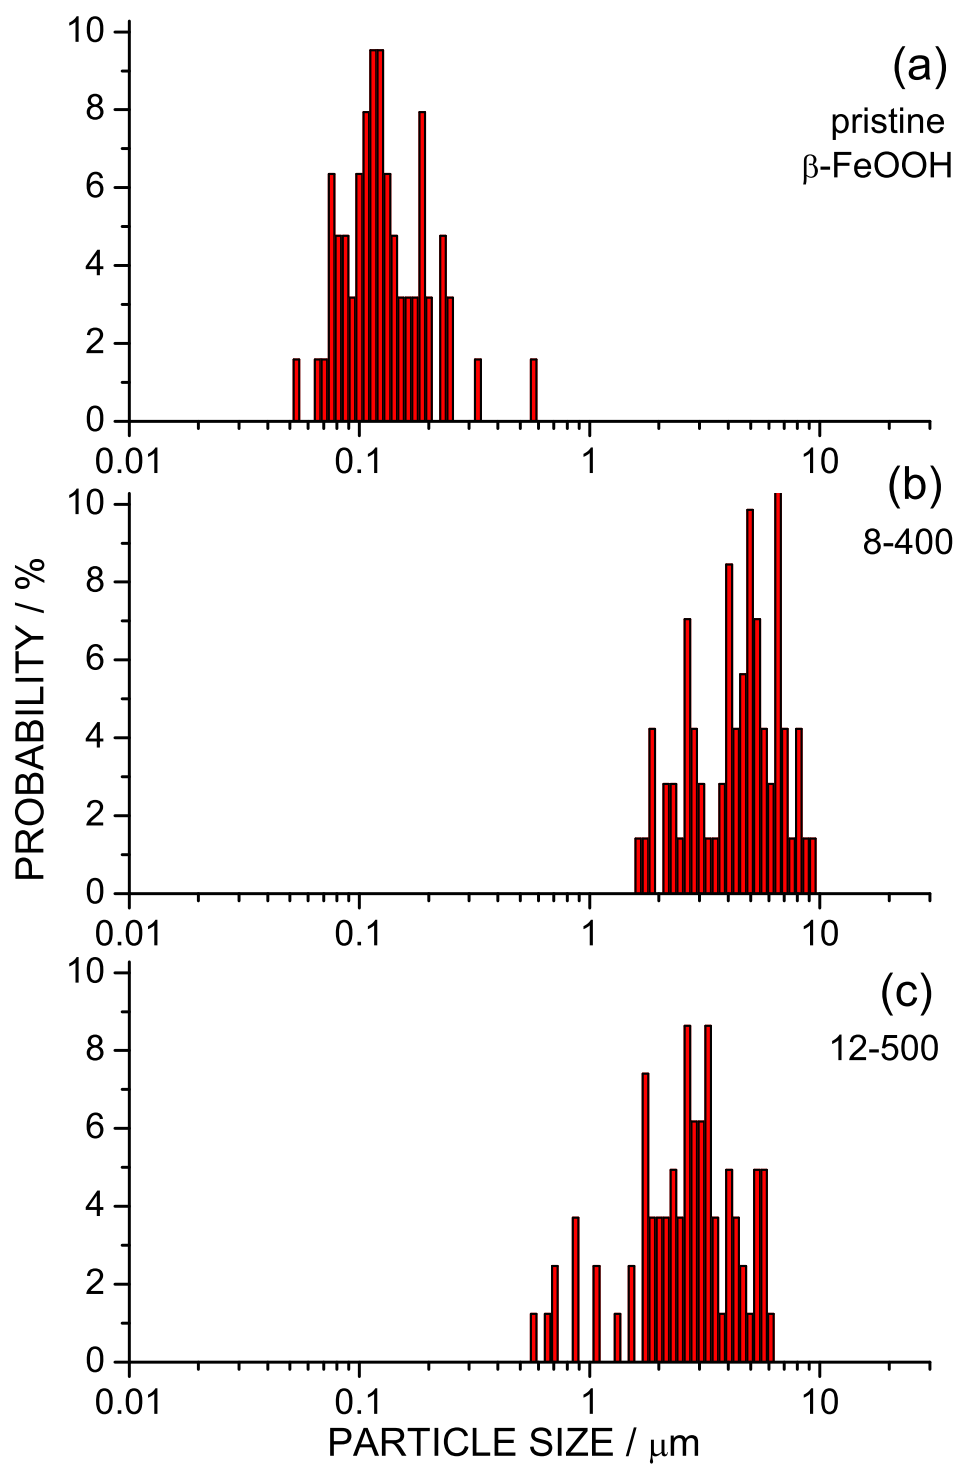

**Fig. S12:** Particle distribution of (a) pristine  $\beta\text{-FeOOH}$ , (b) 8-400, and (c) 12-500 determined by the Image J software.

**Table S1:** Fitting results of Cole-Cole plots for samples of pristine  $\beta$ -FeOOH, 8-200, 8-400, and 12-500

| Sample                  | $R_{\text{sol}} / \Omega$ | $R_{\text{total}} / \Omega$ | CPE / F               | $\alpha$ |
|-------------------------|---------------------------|-----------------------------|-----------------------|----------|
| pristine $\beta$ -FeOOH | 2.66                      | 9.42                        | $25.7 \times 10^{-6}$ | 0.915    |
| 8-200                   | 2.52                      | 91.1                        | $3.47 \times 10^{-6}$ | 0.942    |
| 8-400                   | 2.98                      | 5.11                        | $3.92 \times 10^{-6}$ | 1.02     |
| 12-500                  | 2.57                      | 8.50                        | $7.44 \times 10^{-6}$ | 0.953    |

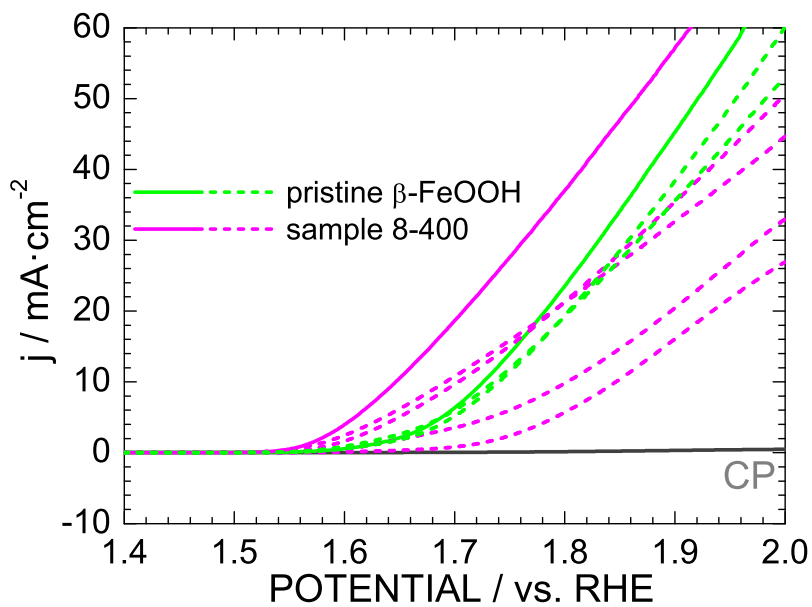

**Fig. S13:** Additional LSV curves of pristine  $\beta$ -FeOOH and sample 8-400.

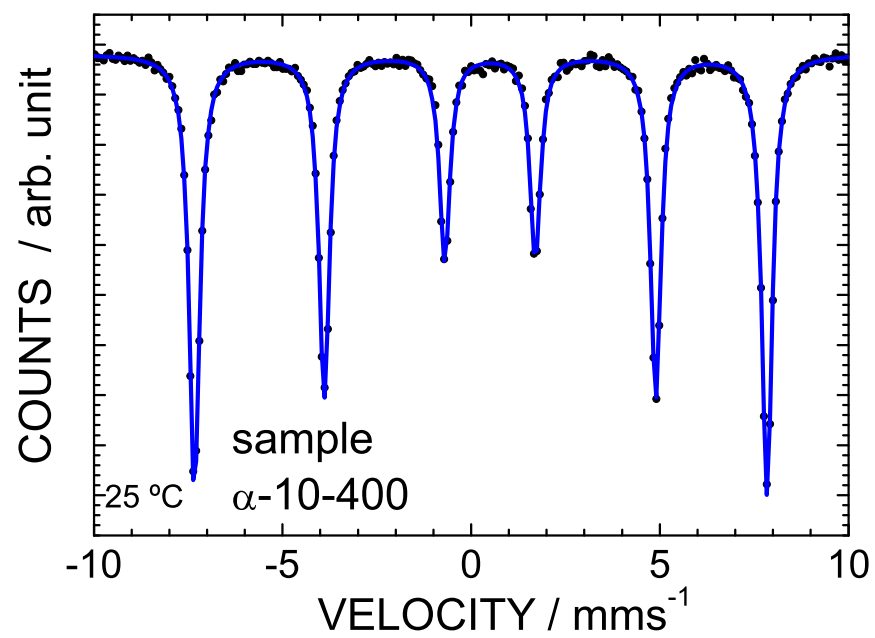

**Fig. S14:** Mössbauer spectrum of sample  $\alpha$ -10-400 at ca. 25 °C.

pristine  $\beta$ -FeOOH

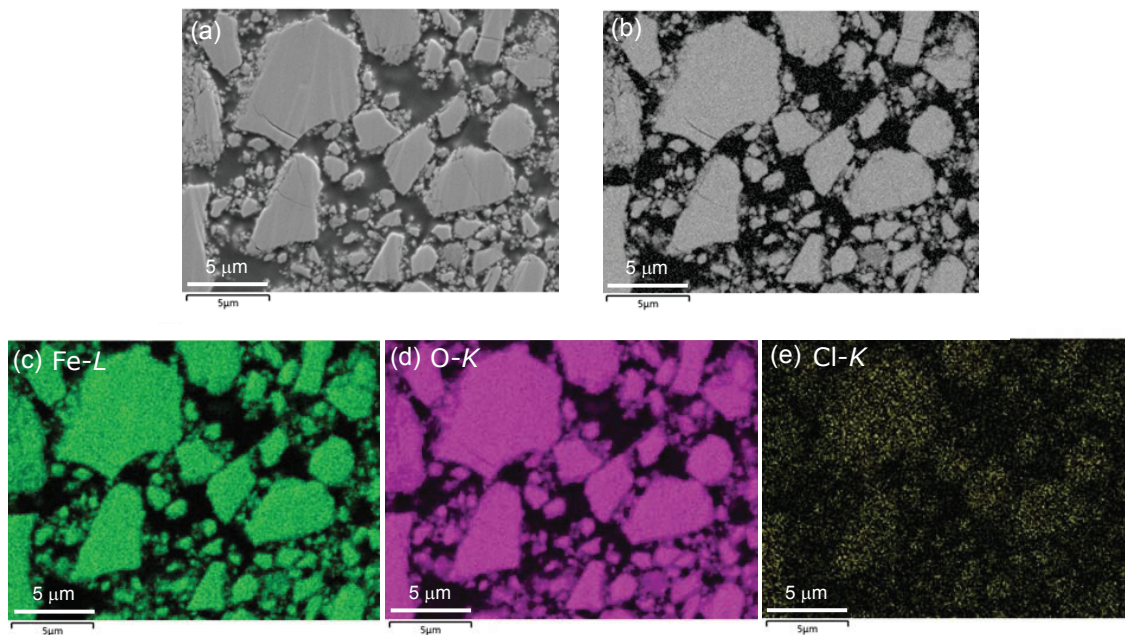

**Fig. S15:** SEM images of pristine  $\beta$ -FeOOH obtained by using (a) secondary electrons and (b) back scattered electrons. EDX mapping for (c) Fe, (d) O, and (e) Cl atoms.



Before  
OER test:  
8-400

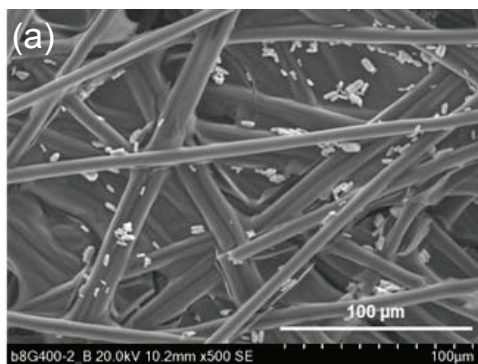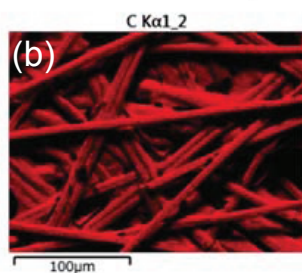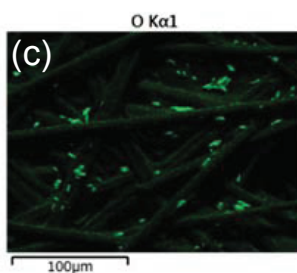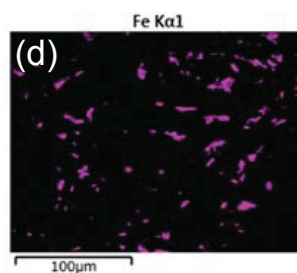

After  
OER test:  
8-400

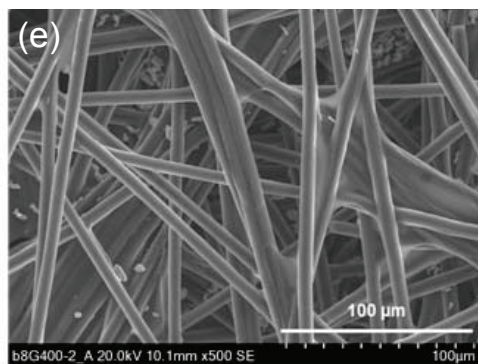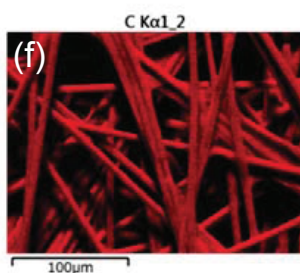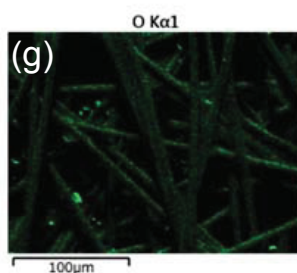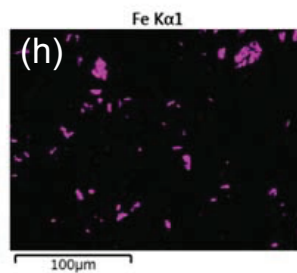

**Fig. S16:** SEM images and EDX mappings for sample 8-400: (a)–(d) before and (e)–(h) after.

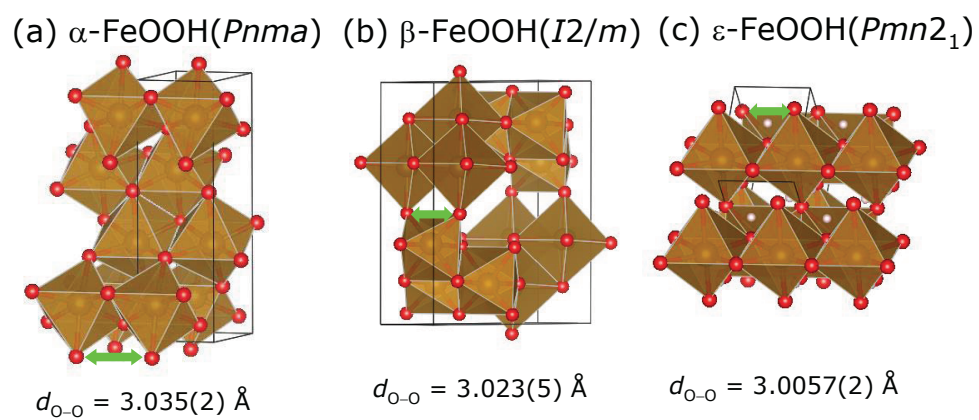

**Fig. S17:** Crystal structure and  $d_{\text{O-O}}$  of (a)  $\alpha$ -FeOOH, (b)  $\beta$ -FeOOH, and (c)  $\epsilon$ -FeOOH.
